# Supplementary material for: Identification of signaling pathways modifying human dopaminergic neuron development using a pluripotent stem cell-based high-throughput screening automated system: purinergic pathways as a proof-of-principle
Source: Front Pharmacol. 2023 Jun 26;14:1152180. doi: 10.3389/fphar.2023.1152180 (PMC10331426; doi:10.3389/fphar.2023.1152180)
Supplement: Supplementary file 7 [file Table1.XLSX]

## Sheet: screened compounds
N° composé
	Cat. No.	CAS #	Drug Name	M.W.	Solvent	Activity
1	AC-589	58-61-7	Adenosine	267.2	DMSO	Endogenous agonist
2	AC-590	96760-69-9	Adenosine amine congener	576.6	DMSO	A1 adenosine agonist
3	AC-594	146-77-0	2-Chloroadenosine	301.7	WATER	A1 adenosine agonist
4	AC-601	78647-50-4	5'-N-Ethylcarboxamidoadenosine	308.3	DMSO	A1/A2 adenosine agonist
5	AC-961	50908-62-8	5'-(N-Cyclopropyl)carboximidoadenosine	320.3	DMSO	A2 adenosine agonist
6	AC-776	35788-27-3	5'-N-Methylcarboxamidoadenosine		DMSO	A2 adenosine agonist
7	AC-581	163042-96-4	1-[2-Chloro-6-[[(3-iodophenyl)methyl]amino]-9H-purin-9-yl]-1-deoxy-N-methyl-β-D-ribofuranuronamide	544.7	DMSO	A3 adenosine agonist
8	AC-582	152918-18-8	1-Deoxy-1-[6-[[(3-iodophenyl)methyl]amino]-9H-purin-9-yl]-N-methyl-β-D-ribofuranuronamide	510.3	DMSO	A3 adenosine agonist
9	AC-588	152918-26-8	N6-(4-Aminobenzyl)-N-methylcarboxamidoadenosine	399.4	DMSO	A3 adenosine agonist
10	AC-1308	89705-21-5	N6-2-(4-Aminophenyl)ethyladenosine	386.4	DMSO
11	AC-585	183721-15-5	MRS 1220	403.8	DMSO	A3 adenosine antagonist
12	AC-586	139180-30-6	ZM 241385	337.3	DMSO	A2A adenosine antagonist
13	AC-772	35873-49-5	8-Cyclopentyltheophylline	248.3	DMSO	A1 adenosine antagonist
14	AC-773	36396-99-3	N6-Cyclohexyladenosine	349.4	DMSO	A1 adenosine agonist
15	AC-774	41552-82-3	N6-Cyclopentyladenosine	335.4	DMSO	A1 adenosine agonist
16	AC-775	102146-07-6	8-Cyclopentyl-1,3-dipropylxanthine	304.4	DMSO	A1 adenosine antagonist
17	AC-778	58-55-9	Theophylline	180.2	DMSO	A2B adenosine receptor ligand
18	AC-627	519-37-9	7-(β-Hydroxyethyl)theophylline	224.2	DMSO	Theophylline analog
19	AC-636	80206-91-3	8-(p-Sulfophenyl)theophylline	336.3	DMSO	Adenosine antagonist
20	AC-615	317-34-0	Aminophylline	420.4	DMSO	Theophylline analog
21	AC-626	80288-49-9	Furafylline	260.2	DMSO	Methylxanthine derivative
22	AC-648	55242-55-2	Propentofylline	306.4	DMSO	Adenosine transport inhibitor
23	LP-102	6493-06--7	(±)-Lisofylline	280.3	DMSO
24	AC-595	37739-05-2	2-Chloro-N6-cyclopentyladenosine	369.8	DMSO	A1 adenosine agonist
25	ALX-550-322	58-08-2	Caffeine	194.2	DMSO	A1/A2A adenosine antagonist
26	AC-609	38594-96-6	(-)-N6-(2-Phenylisopropyl)adenosine	385.4	DMSO	A1 adenosine agonist
27	AC-610	38594-97-7	(+)-N6-(2-Phenylisopropyl)adenosine	385.4	DMSO	A1 adenosine agonist Less active isomer
28	AC-611	143668-15-9	N6-P-Sulfophenyladenosine sodium salt	445.4	DMSO	A1 adenosine agonist
29	AC-612	490-59-5	Alloxazine	214.2	DMSO	A2B adenosine antagonist
30	AC-633	611-59-6	Paraxanthine	180.2	DMSO	Adenosine receptor ligand
31	AC-613	149981-23-7	1-Allyl-3,7-dimethyl-8-phenylxanthine	296.3	DMSO	A1 adenosine antagonist
32	AC-614	149981-25-9	1-Allyl-3,7-dimethyl-8-p-sulfophenylxanthine	376.4	DMSO	A2 adenosine antagonist
33	AC-623	31542-63-9	1,3-Dipropyl-7-methylxanthine	250.3	DMSO	A2 adenosine receptor ligand
34	AC-625	14114-46-6	3,7-Dimethyl-1-propargylxanthine	218.2	DMSO	A2 adenosine antagonist
35	AC-628	28822-58-4	3-Isobutyl-1-methylxanthine	222.2	DMSO	Adenosine receptor antagonist
36	AC-951	85872-53-3	1,3-Dipropyl-8-phenylxanthine	312.4	DMSO	A1 adenosine antagonist
37	AC-635	41078-02-8	3-n-Propylxanthine	194.2	DMSO	A1/2 adenosine antagonist
38	AC-617	104615-18-1	(9-Chloro-2-(2-furyl)(1,2,4)triazolo(1,5-C)quinazolin-5-amine)	285.7	DMSO	Adenosine receptor antagonist
39	AC-619	147700-11-6	8-(3-Chlorostyryl)caffeine	330.8	DMSO	A2A adenosine antagonist
			Blank
40	AC-640	20153-98-4	Dilazep·HCl	677.6	DMSO	Adenosine uptake inhibitor
41	PD-129	51350-19-7	(±)-Erythro-9-(2-hydroxy-3-nonyl)adenine·HCl	313.8	DMSO	Adenosine deaminase inhibitor
42	EI-293	24386-93-4	5-Iodotubericidin	392.1	DMSO	Adenosine kinase inhibitor
43	AD-101	38048-32-7	S-(4-Nitrobenzyl)-6-thioinosine	419.4	DMSO	Adenosine uptake inhibitor
44	AC-646	13153-27-0	S-(4-Nitrobenzyl)-6-thioguanosine	434.4	DMSO	Adenosine transport inhibitor
45	AD-100	102146-07-6	PD 116,948	304.4	DMSO	A1 adenosine antagonist
46	EI-127	58-32-2	Dipydridamole	504.6	DMSO	Adenosine transport inhibitor
47	AC-988	15763-06-1	1-Methyladenosine	281.3	DMSO	Adenosine analog
48	AC-989	1867-73-8	N6-Methyladenosine	281.3	DMSO	Adenosine analog
49	AC-990	2002-35-9	N6-Methyl-2'-deoxyadenosine	265.3	DMSO	Adenosine analog
50	AC-991	979-92-0	S-Adenosyl-L-homocysteine	384.4	DMSO	Adenosine conjugate
51	AC-992	6736-58-9	3-Deazaadenosine	266.3	DMSO	Adenosine analog
	Cat. No.	CAS #	Drug Name	M.W.	Solvent	Activity
52	AC-953	51963-61-2	ATP disodium salt	551.1	WATER	Endogenous P2Y agonist
53	AC-944	43170-89-4	2-Methylthioadenosine triphosphate	641.2	WATER	P2Y agonist
54	AC-1290	135046-48-9	Clopidogrel sulfate	419.9	DMSO	P2Y12 inhibitor
55	AC-946	104869-31-0	NF 023	1162.9	WATER	P2X antagonist
56	AC-947	202983-32-2	NF 279	1401.1	DMSO	P2X1 antagonist
57	AC-948	149017-66-3	Pyridoxalphosphate-6-azophenyl-2',4'-disulfonic acid·4Na	599.3	WATER	P2X antagonist
58	AC-950	1021868-77-8	Pyridoxal-5'-phosphate-6-(2'-naphthylazo-6'-nitro-4',8'-disulfonate)·4Na (PPNDS)	693.9	DMSO	P2X1 antagonist
59	AC-954	102783-36-8	P1,P4-DI(adenosine-5')tetraphosphate ammonium salt	836.4	DMSO	Purinergic receptor ligand
60	AC-955	104809-20-3	α,β-Methyleneadenosine 5'-triphosphate	505.2	WATER	P2X agonist
61	AC-956	7414-56-4	β,γ-Methyleneadenosine 5'-triphosphate·2Na	549.2	WATER	P2X agonist
62	G-430	129-46-4	Suramin·6Na	1429.2	DMSO	P2Y antagonist
63	AC-1002	149022-20-8	Adenosine-5'-monophosphate (AMP)	347.2	DMSO	ATP metabolite
64	AC-995	81921-35-9	N6-Methyladenosine-5'-monophosphate·Na	383.2	WATER	AMP analog
65	AC-996	68414-18-6	Adenosine-5'-diphosphoribose	559.3	DMSO	Endogenous P2Y agonist
66	AC-997	20398-34-9	Adenosine-5'-diphosphate (ADP)	427.2	WATER	Endogenous P2Y agonist
67	AC-998	19817-92-6	Uridine-5'-triphosphate·3Na	550.1	WATER	P2Y4 agonist
68	AC-999	21931-53-3	Uridine-5'-diphosphate	404.2	WATER	P2Y6 agonist
69	AC-1000	3387-36-8	Uridine-5'-monophosphate	368.1	WATER	UTP metabolite
70	AC-1001	104835-70-3	α,β-Methyleneadenosine-5'-diphosphate·Na	425.2	DMSO	ADP agonist
71	AC-993	53885-35-1	Ticlopidine·HCl	300.2	DMSO	P2Y12 receptor ligand
72	AC-1003	36051-31-7	Guanosine-5'-triphosphate·Na	523.2	WATER	Endogenous agonist
73	AC-1004	43139-22-6	Guanosine-5'-diphosphate	443.2	WATER	Endogenous agonist

## Sheet: selected hit from primary S
	cpd #	CAS #	compound name	annoted activity
	2	96760-69-9	Adenosine amine congener	A1 adenosine agonist
	8	152918-18-8	1-Deoxy-1-[6-[[(3-iodophenyl)methyl]amino] -9H-purin-9-yl]-N-methyl-β-D-ribofuranuronamide	A3 adenosine agonist
	16	102146-07-6	8-Cyclopentyl-1,3-dipropylxanthine	A1 adenosine antagonist
	42	24386-93-4	5-Iodotubericidin	Adenosine kinase inhibitor
	47	15763-06-1	1-Methyladenosine	Adenosine analog
	51	6736-58-9	3-Deazaadenosine	Adenosine analog
	57	149017-66-3	Pyridoxalphosphate-6-azophenyl-2',4'-disulfonic acid·4Na	P2X antagonist
	67	19817-92-6	Uridine-5'-triphosphate·3Na	P2Y4 agonist
